# Supplementary material
Source: Springer Nature journal article supplement (https://www.springermedizin.de/resource/supplementary/12939_2012_344_MOESM1_ESM.pdf/9550950)
Supplement: MOESM1 [file 9550950]

Thematic  
analysis of  
coded  
extracts and  
identification  
of health  
human  
resources  
theme

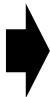

Culling of  
extracts  
related to  
health workers

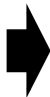

Review of  
culled extracts

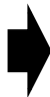

Identification  
of themes for  
manuscript
